# Supplementary material for: Arylsulfonamide chalcones as alternatives for fuel additives: antioxidant activity and machine learning protocol studies
Source: Royal Society of Chemistry journal article supplement (doi:10.1039/d3nj00255a), 2023-01-01
Supplement: d3nj00255a1.pdf [file d3nj00255a1.pdf]

1 **Arylsulfonamide chalcones as alternatives for fuel additives: joint venture**  
2 **antioxidant activity and machine learning protocols**

3  
4  
5 Vitor S. Duarte<sup>\*a</sup>, Igor D. Borges<sup>a,b</sup>, Guilio D. C. d'Oliveira<sup>c</sup>, Eduardo C. M. Faria<sup>a,b</sup>,  
6 Leonardo R. de Almeida<sup>a</sup>, Valter H. Carvalho Silva<sup>a</sup>, Caridad Noda Pérez<sup>c</sup> and  
7 Hamilton B. Napolitano<sup>\*a</sup>  
8

9 <sup>a</sup> Grupo de Química Teórica e Estrutural de Anápolis, Universidade Estadual de Goiás, Anápolis, GO, Brasil.

10 <sup>b</sup> Centro de Pesquisa e Eficiência Energética, CAO A Montadora de Veículos LTDA, Anápolis, GO, Brasil.

11 <sup>c</sup> Instituto de Química, Universidade Federal de Goiás, Goiânia, GO, Brasil.

12  
13  
14 \* vitor.sduarte@seduc.go.gov.br - ORCID: 0000-0001-6145-6210

15 \* hbnapolitano@gmail.com - ORCID: 0000-0002-6047-9995  
16  
17  
18

19 **1. Supplementary information**

20

21 **Table S1.** Crystallographic data and refinement from Chal01 to Chal05 structures.

| Parameters                              |                 | Chal01                                            | Chal02                                              | Chal03                                              | Chal04                                              | Chal05                                                          |
|-----------------------------------------|-----------------|---------------------------------------------------|-----------------------------------------------------|-----------------------------------------------------|-----------------------------------------------------|-----------------------------------------------------------------|
| Chemical formula                        |                 | C <sub>22</sub> H <sub>19</sub> O <sub>4</sub> NS | C <sub>21</sub> H <sub>16</sub> O <sub>3</sub> NSBr | C <sub>21</sub> H <sub>16</sub> O <sub>3</sub> NSCl | C <sub>21</sub> H <sub>16</sub> O <sub>3</sub> NSCl | C <sub>21</sub> H <sub>16</sub> O <sub>5</sub> N <sub>2</sub> S |
| Formula weight (g/mol)                  |                 | 393.44                                            | 442.34                                              | 397.86                                              | 397.86                                              | 408.42                                                          |
| Crystal system                          |                 | monoclinic                                        | monoclinic                                          | monoclinic                                          | triclinic                                           | monoclinic                                                      |
| Space group                             |                 | P2 <sub>1</sub> /n                                | P2 <sub>1</sub> /n                                  | P2 <sub>1</sub> /c                                  | P $\bar{1}$                                         | P2 <sub>1</sub> /c                                              |
| Z, Z'                                   |                 | 4, 1                                              | 4, 1                                                | 4, 1                                                | 2, 1                                                | 4, 1                                                            |
| Unit cell parameters                    | a (Å)           | 11.670(12)                                        | 13.804(12)                                          | 13.795(7)                                           | 8.413(4)                                            | 14.014(16)                                                      |
|                                         | b (Å)           | 12.555(13)                                        | 7.546(7)                                            | 7.584(4)                                            | 9.806(5)                                            | 7.656(9)                                                        |
|                                         | c (Å)           | 13.331(14)                                        | 18.902(15)                                          | 20.272(9)                                           | 13.121(7)                                           | 18.38(2)                                                        |
|                                         | $\alpha$ (°)    | 90                                                | 90                                                  | 90                                                  | 73.23(2)                                            | 90                                                              |
|                                         | $\beta$ (°)     | 101.004(3)                                        | 104.055(3)                                          | 62.896(3)                                           | 85.049(2)                                           | 101.242(4)                                                      |
| $\gamma$ (°)                            |                 | 90                                                | 90                                                  | 90                                                  | 69.892(2)                                           | 90                                                              |
| Volume Cell (Å <sup>3</sup> )           |                 | 1917.6(3)                                         | 1910.2(3)                                           | 1888.07(17)                                         | 973.22(9)                                           | 1934.4(4)                                                       |
| Calculated density (g/cm <sup>3</sup> ) |                 | 1.363                                             | 1.5380                                              | 1.400                                               | 1.358                                               | 1.402                                                           |
| Goodness-of-fit                         |                 | 1.119                                             | 1.0514                                              | 1.040                                               | 1.022                                               | 1.047                                                           |
| Final R indices<br>[I>2 $\sigma$ (I)]   | R <sub>1</sub>  | 0.0504                                            | 0.0314                                              | 0.0384                                              | 0.0444                                              | 0.0528                                                          |
|                                         | wR <sub>2</sub> | 0.1212                                            | 0.0730                                              | 0.1004                                              | 0.1089                                              | 0.1066                                                          |
| R indices (all data)                    | R <sub>1</sub>  | 0.0712                                            | 0.0410                                              | 0.0447                                              | 0.0646                                              | 0.0857                                                          |
|                                         | wR <sub>2</sub> | 0.1389                                            | 0.0778                                              | 0.1057                                              | 0.1211                                              | 0.1193                                                          |

22

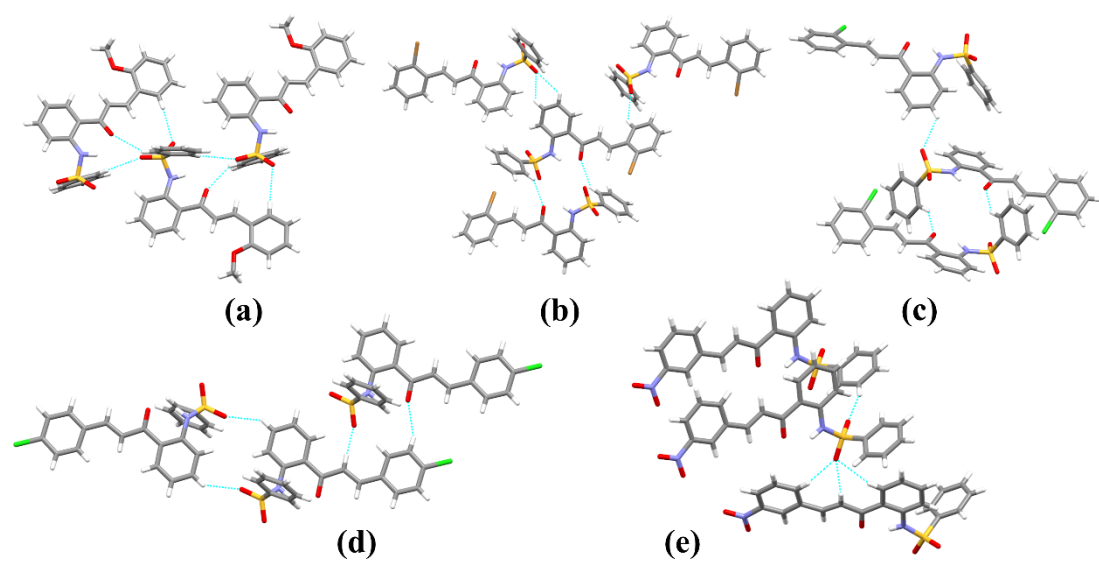

23

24 **Figure S1.** Main interactions of the arylsulfonamide chalcones: Chal01 (a), Chal02 (b), Chal03  
25 (c), Chal04 (d) and Chal05 (e).

26

27

28
